# Supplementary material
Source: PubMed Central journal article supplement (PMC9115848)
Supplement: NIHMS1802413-supplement-1.pdf [file NIHMS1802413-supplement-1.pdf]

516 **Supplemental data**

517 **Table 1: Baseline WORMS Parameters comparing weight loss and stable weight participants<sup>1</sup>**

| WORMS<br>Parameters              | Stable overweight<br>N=380          | >5% weight loss<br>N=380 | P-value |
|----------------------------------|-------------------------------------|--------------------------|---------|
|                                  | predicted mean values [95% CI] (ms) |                          |         |
| <b>Cartilage lesions</b>         |                                     |                          |         |
| PAT                              | 2.39 [2.19, 2.60]                   | 2.51 [2.31, 2.71]        | 0.35    |
| TRO                              | 1.74 [1.55, 1.94]                   | 1.65 [1.47, 1.84]        | 0.44    |
| MT                               | 0.60 [0.46, 0.73]                   | 0.54 [0.41, 0.67]        | 0.27    |
| LT                               | 0.80 [0.67, 0.93]                   | 0.79 [0.65, 0.92]        | 0.86    |
| MF                               | 1.11 [0.95, 1.27]                   | 1.14 [0.97, 1.30]        | 0.11    |
| LF                               | 0.61 [0.48, 0.74]                   | 0.61 [0.48, 0.74]        | 0.98    |
| <b>Cartilage lesions overall</b> | 7.24 [6.65, 7.83]                   | 7.23 [6.68, 7.79]        | 0.78    |
| <b>Meniscus lesions overall</b>  | 2.63 [2.24, 3.02]                   | 2.14 [1.86, 2.42]        | 0.09    |
| <b>Meniscus lesions medial</b>   | 1.39 [1.16, 1.62]                   | 1.18 [1.00, 1.41]        | 0.12    |
| <b>Meniscus lesions lateral</b>  | 1.23 [0.99, 1.48]                   | 0.95 [0.74, 1.35]        | 0.18    |
| <b>Bone marrow edema overall</b> | 2.52 [2.27, 2.78]                   | 2.30 [2.05, 2.55]        | 0.07    |

518 <sup>1</sup>Multivariable linear regression models adjusting for age, sex, baseline BMI and KL score.  
 519 PAT, patella; MT, medial tibia; LT, lateral tibia; MF, medial femur; LF, lateral femur; TRO, femoral trochlea.  
 520

521

522 **Table 2:** Comparison of texture parameters over 96-months<sup>1</sup>

| Texture parameters<br>96-months | Stable overweight    | >5% weight loss      | P-value          |
|---------------------------------|----------------------|----------------------|------------------|
|                                 |                      | Rate/year<br>95% CI  |                  |
| <b>Contrast</b>                 |                      |                      |                  |
| Global knee                     | 25.28 [20.78, 29.80] | 20.87 [15.73, 26.01] | <b>&lt;0.001</b> |
| PAT                             | 13.74 [7.60, 19.89]  | 10.43 [3.44, 17.42]  | <b>&lt;0.001</b> |
| MT                              | 31.68 [25.03, 38.33] | 26.43 [18.89, 33.98] | <b>&lt;0.001</b> |
| LT                              | 13.95 [9.76, 18.1]   | 11.59 [6.82, 16.36]  | <b>&lt;0.001</b> |
| MF                              | 53.89 [45.07, 62.71] | 45.63 [35.61, 55.64] | <b>&lt;0.001</b> |
| LF                              | 20.34 [16.12, 24.55] | 16.62 [11.81, 21.42] | <b>&lt;0.001</b> |
| <b>Variance</b>                 |                      |                      |                  |
| Global knee                     | 14.97 [12.35, 17.59] | 12.55 [9.57, 15.54]  | <b>&lt;0.001</b> |
| PAT                             | 8.86 [4.98, 12.75]   | 6.97 [2.55, 11.34]   | <b>&lt;0.001</b> |
| MT                              | 18.11 [14.13, 22.08] | 15.15 [10.65, 19.66] | <b>&lt;0.001</b> |
| LT                              | 9.03 [6.30, 11.76]   | 7.92 [4.81, 11.03]   | <b>&lt;0.001</b> |
| MF                              | 29.94 [25.16, 34.72] | 25.38 [19.94, 30.81] | <b>&lt;0.001</b> |
| LF                              | 12.57 [9.92, 15.22]  | 10.61 [7.60, 13.64]  | <b>&lt;0.001</b> |

523 LF, lateral femur; LT, lateral tibia; MF, medial femur; MT, medial tibia; PAT, patella

524 <sup>1</sup>Associations between weight loss and change in cartilage texture parameters over 96 months were assessed using  
 525 multivariable regression models adjusting for age, sex, baseline BMI and baseline KL score. Significant results (**P < 0.05**) are  
 526 bolded.

527

528

529 **Table 3:** Comparison of baseline T2 parameters for each weight loss method group compared  
 530 to the stable weight group

|                             | Stable weight<br>N=380 | Diet&Exercise<br>N=101 | Diet<br>N=41         | Exercise<br>N=33     | P-<br>value |
|-----------------------------|------------------------|------------------------|----------------------|----------------------|-------------|
|                             | T2 (ms)<br>95% CI      | T2 (ms)<br>95% CI      | T2 (ms)<br>95% CI    | T2 (ms)<br>95% CI    |             |
| <b>Cartilage T2</b>         |                        |                        |                      |                      |             |
| Global knee                 | 32.67 [32.41, 32.93]   | 32.50 [32.12, 32.89]   | 31.58 [30.76, 32.40] | 31.23 [30.47, 31.98] | 0.101       |
| PAT                         | 31.00 [30.63, 31.37]   | 31.19 [30.62, 31.75]   | 30.68 [29.67, 31.69] | 30.05 [28.91, 31.19] | 0.657       |
| MT                          | 29.57 [29.16, 29.98]   | 29.14 [28.71, 29.58]   | 28.07 [27.34, 28.80] | 28.87 [28.95, 29.06] | 0.124       |
| LT                          | 27.65 [27.32, 27.97]   | 27.51 [27.08, 27.93]   | 26.66 [25.76, 27.55] | 26.47 [25.65, 27.28] | 0.111       |
| MF                          | 39.48 [39.12, 39.84]   | 38.99 [38.43, 39.54]   | 38.21 [36.88, 39.55] | 38.22 [37.23, 39.21] | 0.364       |
| LF                          | 36.13 [35.77, 36.48]   | 35.80 [35.20, 36.39]   | 35.07 [33.86, 36.29] | 34.97 [33.87, 36.07] | 0.437       |
| <b>Deep layer T2</b>        |                        |                        |                      |                      |             |
| Global knee                 | 29.97 [29.61, 30.33]   | 29.64 [29.33, 29.94]   | 29.09 [28.39, 29.78] | 28.78 [28.15, 29.41] | 0.143       |
| PAT                         | 28.25 [27.81, 28.70]   | 28.59 [28.11, 29.07]   | 28.21 [27.24, 29.17] | 27.68 [26.75, 28.61] | 0.866       |
| MT                          | 26.36 [25.85, 27.88]   | 26.44 [26.08, 26.80]   | 25.88 [25.41, 26.35] | 25.76 [24.85, 26.66] | 0.112       |
| LT                          | 24.03 [23.62, 24.44]   | 23.75 [23.45, 24.04]   | 23.25 [22.67, 23.84] | 23.34 [22.75, 23.93] | 0.367       |
| MF                          | 37.08 [36.57, 37.58]   | 36.28 [35.68, 36.87]   | 35.90 [34.57, 37.22] | 36.15 [35.15, 37.16] | 0.233       |
| LF                          | 33.66 [33.18, 34.15]   | 33.11 [32.57, 33.64]   | 32.88 [31.77, 33.99] | 32.61 [31.47, 33.75] | 0.364       |
| <b>Superficial layer T2</b> |                        |                        |                      |                      |             |
| Global knee                 | 35.42 [35.01, 35.83]   | 35.43 [34.92, 35.93]   | 34.11 [33.11, 35.11] | 33.75 [32.83, 34.67] | 0.334       |
| PAT                         | 33.40 [32.86, 33.94]   | 33.84 [33.11, 34.57]   | 33.12 [31.89, 34.35] | 32.49 [31.03, 33.94] | 0.927       |
| MT                          | 32.13 [31.57, 32.70]   | 32.14 [31.52, 32.77]   | 30.55 [29.47, 31.63] | 30.35 [29.07, 31.64] | 0.301       |
| LT                          | 30.92 [30.41, 31.44]   | 31.24 [30.62, 31.86]   | 30.08 [28.84, 31.31] | 29.59 [28.46, 30.71] | 0.787       |
| MF                          | 42.40 [41.86, 42.94]   | 41.74 [41.14, 42.35]   | 40.51 [39.07, 41.95] | 40.29 [39.12, 41.46] | 0.162       |
| LF                          | 38.83 [38.31, 39.35]   | 38.43 [37.72, 39.15]   | 37.21 [35.84, 38.58] | 37.29 [36.08, 38.50] | 0.333       |

531 LF, lateral femur; LT, lateral tibia; MF, medial femur; MT, medial tibia; PAT, patella

532 \* The associations between different weight loss methods and baseline T2 over 96 months were assessed using multivariable  
 533 regression models adjusting for age, sex, baseline BMI and baseline KL score. Significant results (**P < 0.05**) are bolded.

534

535
